# Supplementary material for: Patterns of Mangrove Resource Uses within the Transboundary Conservation Area of Kenya and Tanzania
Source: Preprints.org preprint supplement (doi:10.20944/preprints202402.1395.v1), 2024-02-26
Supplement: Supplementary file 1 [file supplementary]

**Supplementary Materials**

**1. Household Questionnaire**

1. **Personal Information**
   1. Name of the respondent (optional).....................................................................................................
   2. Sex of respondent: 1. Male (…) 2. Female (….)
   3. Age of respondent………………………………………
   4. Are you the head of the household 1.Yes (…) 2.No (…)
2. If no, what is the sex of the head of the household? 1. Male (…) 2. Female (….)
   1. What is the age of the head of the household ……………………………………………………..
   2. What is the highest level of Education of the household head (Tick where applicable): No education (1) Incomplete primary (2) Complete primary (3), Incomplete secondary (4) Completed Secondary (5), Higher education (6), Madrassa (7), other (please specify) (8)...................................
   3. How many years has the household head lived in the area? ……………………………………….
   4. Marital Status of Household head 1= Married ( ) 2= Single ( ) 3= Widowed ( ) 4= Divorced ( ) 5= Separated ( ) 6= other (specify) ( )……………………………
   5. Size of household .........No. of spouses.........No. of children < 18....... No. of Children >18…… Any other relative or person living in the household………………………………………………
   6. Main occupation of household head (Primary Occupation) ………………………………………
3. What is the amount of income……………………………………...........................................
   1. Any other activity providing livelihood for the household head (secondary)? …………………..
   2. Occupation for spouse……………………………………………………………………………..
   3. Type of employment for household head: 1. Self-employed [ ] 2.Employed [ ]
4. If employed, what is the basis of employment for household head: Temporal 1 Permanent 2
5. **Extractable mangrove goods**
   1. Do you use mangrove products? 1 [Yes] 2 [No]
   2. If yes what do you get from the mangroves?

| Products | Preferred Mangrove species | Local name | Which plant parts (flower, fruit, seed, leaf, twig, bark, wood, tuber and root, grass and other product) |
| --- | --- | --- | --- |
| Fuel wood |  |  |  |
| Construction poles |  |  |  |
| Food (Seeds, fruits, honey) |  |  |  |
| Medicinal products |  |  |  |
| Wild Fish |  |  |  |
| Farmed fish |  |  |  |
| Other(specify) |  |  |  |

- 1. Which of the above listed uses is the most used within your household? ........................................

1. **Mangrove Resource use**
   1. Where, within the forest, does the harvesting of the goods take place?

a). Along the forest edge, closest to home

b). Deep in the heart of the forest

c). In a forest region that is far off and requires traveling

d). Anywhere

e). Do not know

- 1. Are there areas that are over harvested? 1Yes 2 No 3 Not aware
  2. Which products do you get from mangroves, how often do you harvest them and what is the estimated value for that product?
  3. Is there a change in supply of this goods over time and in terms of seasonality? 1 [Yes] 2 [No] 3 [Not aware]

b. If yes, Explain………………………………………………………………………………

- 1. If the good is not sold in any market and you were not able to harvest it, what effect would this have on your livelihood?
  2. Do you harvest mangroves products for uses other than those within your household? A.Yes (…) b. No (…)

1. If yes, which ones? ……………………………………………………………………….
2. If it is sold, who is it sold to (locally, in a nearby market town, in the nearest city)
3. Does the price vary (seasonal variation) during the year? …………………………………………
4. **Perceived changes to mangrove stands**
   1. **Threats and activities**
   2. What is your view on the overall condition of the mangrove ecosystem in the past 5 years? Not Degraded ( ) slightly degraded ( ) Unchanged ( ) Severely Degraded ( ) Very Severely Degraded ( )
   3. Has it become easier or more difficult to harvest mangroves? ……………………………
5. Why do you think so? ……………………………………………………………………………
   1. **Sustainability**

| Products | 1. Resource use frequency 2. Daily 3. Weekly 4. Fortnight 5. Monthly 6. Other…specify | b. The amount and Kg of wild products harvested  (bundles, tins, headloads, baskets) | c Alternative if the mangrove product were not available | d. Alternative sources   1. Purchased 2. Obtained for free |
| --- | --- | --- | --- | --- |
| Fuel wood |  |  |  |  |
| Timber /construction poles |  |  |  |  |
| Food (Fruit, seeds, honey) |  |  |  |  |
| Medicinal products |  |  |  |  |
| Wild Fish |  |  |  |  |
| Farmed Fish |  |  |  |  |
| Other(specify) |  |  |  |  |

- 1. How are the products being harvested?

1. Under harvested (…) 2. In Sustainable amounts (…) 3.Over harvested (…)
   1. If they are being overharvested what is the best way of harvesting that would ensure the products remain while maintaining the people’s livelihood? .....................................

| Products | How have the availability of the product changed in the past 10 years   1. Declined a lot 2. Declined a little 3. Same 4. Increased slightly 5. Increased a lot | Has the time spent harvesting changed in the past 10 years   1. Declined a lot 2. Declined a little 3. Same 4. Increased slightly 5. Increased a lot | What is the cause of the change |
| --- | --- | --- | --- |
| Fuel wood |  |  |  |
| Timber/ construction poles |  |  |  |
| Food (seeds, fruits) |  |  |  |
| Medicinal products |  |  |  |
| Wild Fish |  |  |  |
| Farmed Fish |  |  |  |
| Other(specify) |  |  |  |

6.0 **Participation in Conservation**

1. Are there user groups involved in conservation in this area? 1 [Yes] 2 [No]
2. If yes, name them? …………………………………………………………………………..

6.2. Are you a member of any user group?

1. [Yes] 2 [No]
2. If yes, which one? ……………………………………………………………………………..
3. Activities your group is involved in? ………………………………………………..
4. Challenges facing your group in mangrove conservation…………………………….
5. Suggestions for manage this challenges? ………………………………………………

Additional comment? ……………………………………………………………………………..

**2. Nominal Group Technique Questions**

**A. General information of the respondent**

- 1. Name of the respondent
  2. Name of their user group
  3. Village
  4. Main source of income
  5. Alternative source of income
  6. .Gender

**Question 1: Identify extractable mangrove goods (What do you use mangroves for)**

*Step 1: Individual listing of key extractable ecosystem goods*

*Step 2: Choose the top 5 goods and give each a score (1: Highest importance-5: lowest importance)*

**Question 2: Identify threats facing mangroves in your area**

*Step 1: Individual listing of threats facing mangroves*

*Step 2: Choose the top 5 threats and give each a score (1: Highest importance-5: lowest importance)*
